# Supplementary material for: Hydrothermal Conversion of Spent Sugar Beets into High-Value Platform Molecules
Source: PubMed Central journal article supplement (PMC7504806; doi:10.3390/molecules25173914), 2020-08-27
Supplement: molecules-25-03914-s001.pdf [file molecules-25-03914-s001.pdf]

# Hydrothermal Conversion of Spent Sugar Beets into High-Value Platform Molecules

Jens Pfersich <sup>1,\*</sup>, Pablo J. Arauzo <sup>1</sup>, Michela Lucian <sup>2</sup>, Pierpaolo Modugno <sup>3</sup>, Maria-Magdalena Titirici <sup>4</sup>, Luca Fiori <sup>2</sup> and Andrea Kruse <sup>1</sup>

<sup>1</sup> Conversion technologies of biobased resources, University of Hohenheim, Garbenstrasse 9, 70599 Stuttgart, Germany; Pablj.Arauzo@uni-hohenheim.de (P.J.A.); Andrea\_Kruse@uni-hohenheim.de (A.K.)

<sup>2</sup> Department of Civil, Environmental and Mechanical Engineering, University of Trento, Via Mesiano 77, 38123 Trento, Italy; Michela.Lucian@unitn.it (M.L.); Luca.Fiori@unitn.it (L.F.)

<sup>3</sup> School of Engineering and Materials Science, Queen Mary University of London, Mile End Road, London E1 4NS, UK; P.Modugno@qmul.ac.uk (P.M.)

<sup>4</sup> Department of Chemical Engineering, Imperial College London, South Kensington, London, SW7 2AZ, UK; M.Titirici@imperial.ac.uk (M.T.)

\* Correspondence: Jens.Pfersich@uni-hohenheim.de; Tel.: +49-711-459-24705

**Abstract:** The growing importance of bio-based products, combined with the desire to decrease the production of wastes, boosts the necessity to use wastes as raw materials for bio-based products. A waste material with a large potential is spent sugar beets, which are mainly used as animal feeds or fertilizers. After hydrothermal treatment, the produced chars exhibited an H/C ratio of 1.2 and a higher heating value of 22.7 MJ/kg, which were similar to that of subbituminous coal and higher than that of lignite. Moreover, the treatment of 25 g/L of glucose and 22 g/L of fructose by heating up to 160 °C led to a possible application of spent sugar beets for the production of 5-hydroxymethylfurfural. In the present study, the maximum concentration of 5-hydroxymethylfurfural was 3.4 g/L after heating up to 200 °C.

**Keywords:** agro-residues; sugar beets; biomass; hydrothermal carbonization; hydrolysis; sugars; HMF; hydrochar; biorefinery

Table S1: Concentration of the sugars in the process liquid, pH and dissolved organic carbon (DOC) after HT; the error is estimated to be 0.05 [g/L] due to dilution errors and the high concentrations.

| Sample    | Glucose [g/L] | Fructose [g/L] | Sucrose [g/L] | pH   | DOC [ <sup>0</sup> / <sub>00</sub> ] |
|-----------|---------------|----------------|---------------|------|--------------------------------------|
| Raw       | 0.2           | 0.4            | 3.3           | 5.98 | 18.7                                 |
| L_160_0   | 25.2          | 22.5           | 0             | 3.94 | 67.2                                 |
| L_160_0.5 | 17.3          | 14.3           | 0.2           | 3.81 | 59.3                                 |
| L_160_1   | 15.0          | 13.3           | 0.2           | 3.72 | 54.7                                 |
| L_200_0   | 2.5           | 5.4            | 0.2           | 3.46 | 46.7                                 |
| L_200_0.5 | 2.9           | 1.4            | 0.1           | 3.55 | 42.0                                 |
| L_200_1   | 1.8           | 1.1            | 0.1           | 3.73 | 37.0                                 |

Table S2: Concentration of the acids, HMF and Furfural in the process liquid after HT; the error is estimated to be 0.05 [g/L] due to dilution errors and the high concentrations.

| Sample    | Levulinic Acid<br>[g/L] | Acetic<br>Acid [g/L] | HMF<br>[g/L] | Furfural<br>[g/L] |
|-----------|-------------------------|----------------------|--------------|-------------------|
| Raw       | 0                       | 3                    | 0            | 0                 |
| L_160_0   | 0.5                     | 0.4                  | 0.6          | 0                 |
| L_160_0.5 | 0.6                     | 0.5                  | 1.6          | 0.1               |
| L_160_1   | 1.3                     | 0.1                  | 2.5          | 0.2               |
| L_200_0   | 3.3                     | 1.4                  | 3.4          | 0.3               |
| L_200_0.5 | 3.5                     | 1.7                  | 2.4          | 0.1               |
| L_200_1   | 2.8                     | 1.7                  | 0.9          | 0                 |

Table S3: O/C and H/C atomic ratios of the hydrochars and raw material.

| Sample    | O/C | H/C |
|-----------|-----|-----|
| Raw       | 0.8 | 1.8 |
| S_160_0   | 0.7 | 1.5 |
| S_160_0.5 | 0.6 | 1.5 |
| S_160_1   | 0.5 | 1.3 |
| S_200_0   | 0.4 | 1.2 |
| S_200_0.5 | 0.4 | 1.2 |
| S_200_1   | 0.4 | 1.2 |
